# Supplementary material
Source: MDPI journal article supplement (https://www.mdpi.com/2075-163X/13/4/578)
Supplement: s1 [file s1]

Table S3. Final pH and solubility data of Toolse 2.

| Experiment<br>nr. | HCl<br>(M) | Sample<br>mass<br>(g) | HCl dose,<br>HCl/Ca+Mg<br>(mole<br>ratio) | pH<br>final | P              | F     | Mg    | Fe    | REE  |
|-------------------|------------|-----------------------|-------------------------------------------|-------------|----------------|-------|-------|-------|------|
|                   |            |                       |                                           |             | Solubility (%) |       |       |       |      |
|                   |            |                       |                                           |             | Y1             | Y2    | Y3    | Y4    | Y5   |
| RS9               | 0.518      | 21.065                | 2.72                                      | 1.72        | 99.25          | 93.42 | 90.96 | 25.79 | 18.3 |
| RS2               | 0.518      | 28.006                | 2.04                                      | 2.0         | 96.54          | 82.70 | 80.60 | 36.96 | 4.06 |
| RS7               | 0.518      | 35.100                | 1.63                                      | 2.05        | 89.39          | 44.55 | 71.05 | 13.44 | 2.09 |
| RS5               | 0.983      | 40.093                | 2.71                                      | 1.56        | 96.23          | 92.14 | 91.94 | 31.93 | 6.56 |
| RS1               | 0.983      | 53.005                | 2.05                                      | 1.45        | 97.86          | 41.12 | 74.16 | 21.93 | 3.18 |
| RS4               | 0.983      | 67.052                | 1.62                                      | 1.7         | 93.25          | 15.02 | 72.12 | 13.60 | 1.84 |
| RS8               | 1.485      | 60.008                | 2.73                                      | 1.4         | 98.00          | 90.10 | 95.31 | 30.77 | 7.03 |
| RS3               | 1.485      | 80.042                | 2.05                                      | 1.44        | 95.34          | 29.69 | 78.85 | 20.34 | 2.65 |
| RS6               | 1.485      | 100.04                | 1.64                                      | 1.4         | 89.18          | 12.82 | 68.72 | 15.16 | 1.76 |
