# Supplementary material
Source: MDPI journal article supplement (https://www.mdpi.com/2075-163X/13/4/578)
Supplement: s1 [file s1]

Table S2. Solubility data of Ülgase.

| Experiment<br>nr. | HCl<br>(M) | Sample<br>mass (g) | HCl/Ca<br>(mole<br>ratio) | Solubility (%) |       |       |       |
|-------------------|------------|--------------------|---------------------------|----------------|-------|-------|-------|
|                   | X1         | X2                 |                           | P              | F     | Fe    | REE   |
|                   |            |                    |                           | Y1             | Y2    | Y3    | Y4    |
| RU3               | 0.49       | 20.0046            | 2.51                      | 99.67          | 100   | 60.59 | 100   |
| RU2b              | 0.49       | 25.0043            | 2.01                      | 86.96          | 93.19 | 52.90 | 89.23 |
| RU2               | 0.49       | 25.0046            | 2.01                      | 87.83          | 94.27 | 52.23 | 91.09 |
| RU5               | 0.518      | 34.0018            | 1.56                      | 71.80          | 70.71 | 48.29 | 49.79 |
| RU4               | 0.49       | 50.0015            | 1.01                      | 52.50          | 44.59 | 37.56 | 1.31  |
| RU7               | 1.01       | 36.0026            | 2.88                      | 100            | 100   | 74.50 | 100   |
| RU6               | 1.01       | 51.0041            | 2.03                      | 93.250         | 91.4  | 57.51 | 8.90  |
| RU8               | 1.01       | 67.0014            | 1.55                      | 82.06          | 44.44 | 44.91 | 0.62  |
| RU9               | 1.5        | 52.0049            | 2.96                      | 100            | 100   | 74.49 | 100   |
| RU11              | 1.5        | 76.0076            | 2.02                      | 99.66          | 46.62 | 54.83 | 5.66  |
| RU10              | 1.5        | 100.0029           | 1.54                      | 85.65          | 26.15 | 45.88 | 5.55  |
