# Supplementary material
Source: MDPI journal article supplement (https://www.mdpi.com/2075-163X/13/4/578)
Supplement: s1 [file s1]

Table S1. Final pH and solubility data of Toolse 1.

| Experiment<br>nr. | HCl (M) | Sample<br>mass (g) | Mixing<br>rate (rpm) | HCl/Ca<br>(mole ratio) | final<br>pH | P              | F     | Mg    | Fe    | REE   |
|-------------------|---------|--------------------|----------------------|------------------------|-------------|----------------|-------|-------|-------|-------|
|                   | x1      | x2                 | x3                   |                        |             | Solubility (%) |       |       |       |       |
|                   |         |                    |                      |                        |             | y1             | y2    | Y3    | Y4    | Y5    |
| RT4               | 0.491   | 125                | 550                  | 0.79                   | 2.05        | 44.4           | 4.67  | 26.69 | 3.40  | 0.18  |
| RT7               | 0.491   | 125                | 450                  | 0.79                   |             | 42.2           | 5.54  | 23.81 | 3.85  | 0.19  |
| RT5               | 0.491   | 75                 | 550                  | 1.31                   | 1.88        | 73.4           | 10.67 | 40.39 | 6.17  | 0.19  |
| RT6               | 0.491   | 75                 | 650                  | 1.31                   |             | 70.9           | 11.17 | 41.25 | 6.26  | 0.20  |
| RT13              | 0.491   | 45                 | 350                  | 2.22                   | 1.30        | 101.7          | 70.84 | 66.30 | 15.62 | 0.47  |
| RT1               | 1.01    | 97                 | 550                  | 2.08                   | 1.1         | 99.8           | 13.89 | 64.74 | 12.73 | 0.39  |
| RT8               | 1.01    | 97                 | 450                  | 2.08                   |             | 94.8           | 17.36 | 57.75 | 9.93  | 0.49  |
| RT9               | 1.01    | 97                 | 650                  | 2.08                   |             | 98.2           | 15.77 | 59.02 | 10.08 | 0.44  |
| RT15              | 1.01    | 100                | 650                  | 2.00                   | 1.06        | 95.9           | 18.88 | 66.55 | 12.61 | 0.50  |
| RT2               | 1.43    | 125                | 550                  | 2.29                   | 0.70        | 97.0           | 16.09 | 69.84 | 15.70 | 0.78  |
| Rt11              | 1.43    | 125                | 650                  | 2.29                   | 0.80        | 95.2           | 19.30 | 69.34 | 12.48 | 1.25  |
| RT3               | 1.43    | 75                 | 550                  | 3.81                   |             | 99.5           | 84.90 | 86.42 | 22.01 | 37.58 |
| RT10              | 1.43    | 75                 | 450                  | 3.81                   |             | 96.6           | 90.23 | 77.19 | 20.80 | 32.57 |
